# Supplementary material for: Betanin protects against bleomycin-induced pulmonary fibrosis by regulating the NLRP3/IL-1β/TGF-β1 pathway-mediated epithelial-to-mesenchymal transition
Source: Royal Society of Chemistry journal article supplement (doi:10.1039/d3fo03464j), 2023-12-12
Supplement: d3fo03464j1.xlsx [file d3fo03464j1.xlsx]

## Sheet: lung index
Normal control	BLM	BLM + BET
0.005	0.007	0.006
0.005	0.007	0.005
0.005	0.006	0.006
0.005	0.007	0.005
0.005	0.007	0.006
0.005	0.007	0.005

## Sheet: LDH
Normal control	BLM	BLM + BET
42.7	227.8	90.7
42	225.7	88.4
41.7	227.9	91
42.5	230.5	90.1
43.1	229.5	88.7
41	227.2	89.9

## Sheet: NLRP3
Normal control	BLM	BLM + BET
0.672	1.967	1.275
0.348	2.312	1.548
0.825	2.156	1.167
0.699	2.134	1.196
0.567	2.298	1.381
0.81	2.301	1.524

## Sheet: ASC
Normal control	BLM	BLM + BET
0.426	1.378	0.785
0.365	1.84	1.125
0.382	1.625	0.684
0.356	1.76	0.653
0.412	1.611	0.745
0.398	1.356	0.761

## Sheet: Caspase-1
Normal control	BLM	BLM + BET
86.3	215	146.3
107.2	174.7	130
121.6	168.5	112.6
100.7	205.1	125.2
92.4	195.9	139.3
108.2	179.2	118.6

## Sheet: Vimentin
Normal control	BLM	BLM + BET
0.679	1.78	1.417
0.527	2.15	1.258
0.875	1.93	1.037
0.832	2.05	1.154
0.741	1.875	1.076
0.699	1.923	1.298

## Sheet: TGF-β1 
Normal control	BLM	BLM + BET
34.2	124.5	57.4
28.5	163.5	83.2
37.6	155	47.3
30.1	135.7	52.3
29.7	159.4	60.9
28.1	145.6	49.1

## Sheet: MDA
Normal control	BLM	BLM + BET
15.8	67.2	36.9
17.9	64	31.7
17.5	64.5	31.9
16.9	66.8	33.5
15.2	65.2	34.2
17.1	67.1	34.8

## Sheet: GSH
Normal control	BLM	BLM + BET
51.9	1.8	23.7
37.3	3.2	22.8
42.7	3	22
37.9	1.9	23.2
50.4	2.6	22.5
47.5	2.9	24.1

## Sheet: IL-1β
Normal control	BLM	BLM + BET
3.489	38.52	18.587
6.372	40.85	19.365
5.366	36.332	21.36
8.314	31.33	15.369
7.92	39.34	17.8
6.942	38.314	14.687

[truncated: 8 more sheets: E-cadherin , α-SMA , Total cell count , Neutrophils, lymphocytes, Collagen fiber area%, Inflammatory score, hydroxyproline]
